# Supplementary material for: In Vivo Ocular Pharmacokinetics and Toxicity of Siponimod in Albino Rabbits
Source: PubMed Central journal article supplement (PMC11220753; doi:10.1021/acs.molpharmaceut.4c00063), 2024-06-10
Supplement: mp4c00063_si_001.pdf [file mp4c00063_si_001.pdf]

## Supplementary Material

### ***In vivo* ocular pharmacokinetics and toxicity of siponimod in albino rabbits**

Rasha A. Alshaikh <sup>a</sup>, Rania A. Salah El Din <sup>b,c</sup>, Rania Gamal Eldin Zaki<sup>d</sup>, Christian Waeber

<sup>a,e</sup>, Katie B. Ryan <sup>a,f</sup>

<sup>a</sup> School of Pharmacy, University College Cork, Cork, Ireland.

<sup>b</sup> Department of Anatomy and Embryology, Faculty of Medicine, Ain Shams University, Cairo, Egypt.

<sup>c</sup> Department of Anatomy and Embryology, Faculty of Medicine, Newgiza University

<sup>d</sup> Department of Ophthalmology, Faculty of Medicine, Ain Shams University, Cairo, Egypt.

<sup>e</sup> Department of Pharmacology and Therapeutics, School of Medicine, University College Cork, Cork, Ireland

<sup>f</sup> SSPC The SFI Research Centre for Pharmaceuticals, School of Pharmacy, University College Cork, Cork, Ireland

#### **Corresponding author**

Katie B. Ryan

School of Pharmacy,

University College Cork,

Cork,

Ireland.

Tel 00353-21-4901680

[Katie.ryan@ucc.ie](mailto:Katie.ryan@ucc.ie)

(A)

RA\_Siponimod Stock Sample \_1\_20230713 320 (5.914) Cm (300:368-107:232)

1: Scan ES+  
2.70e6

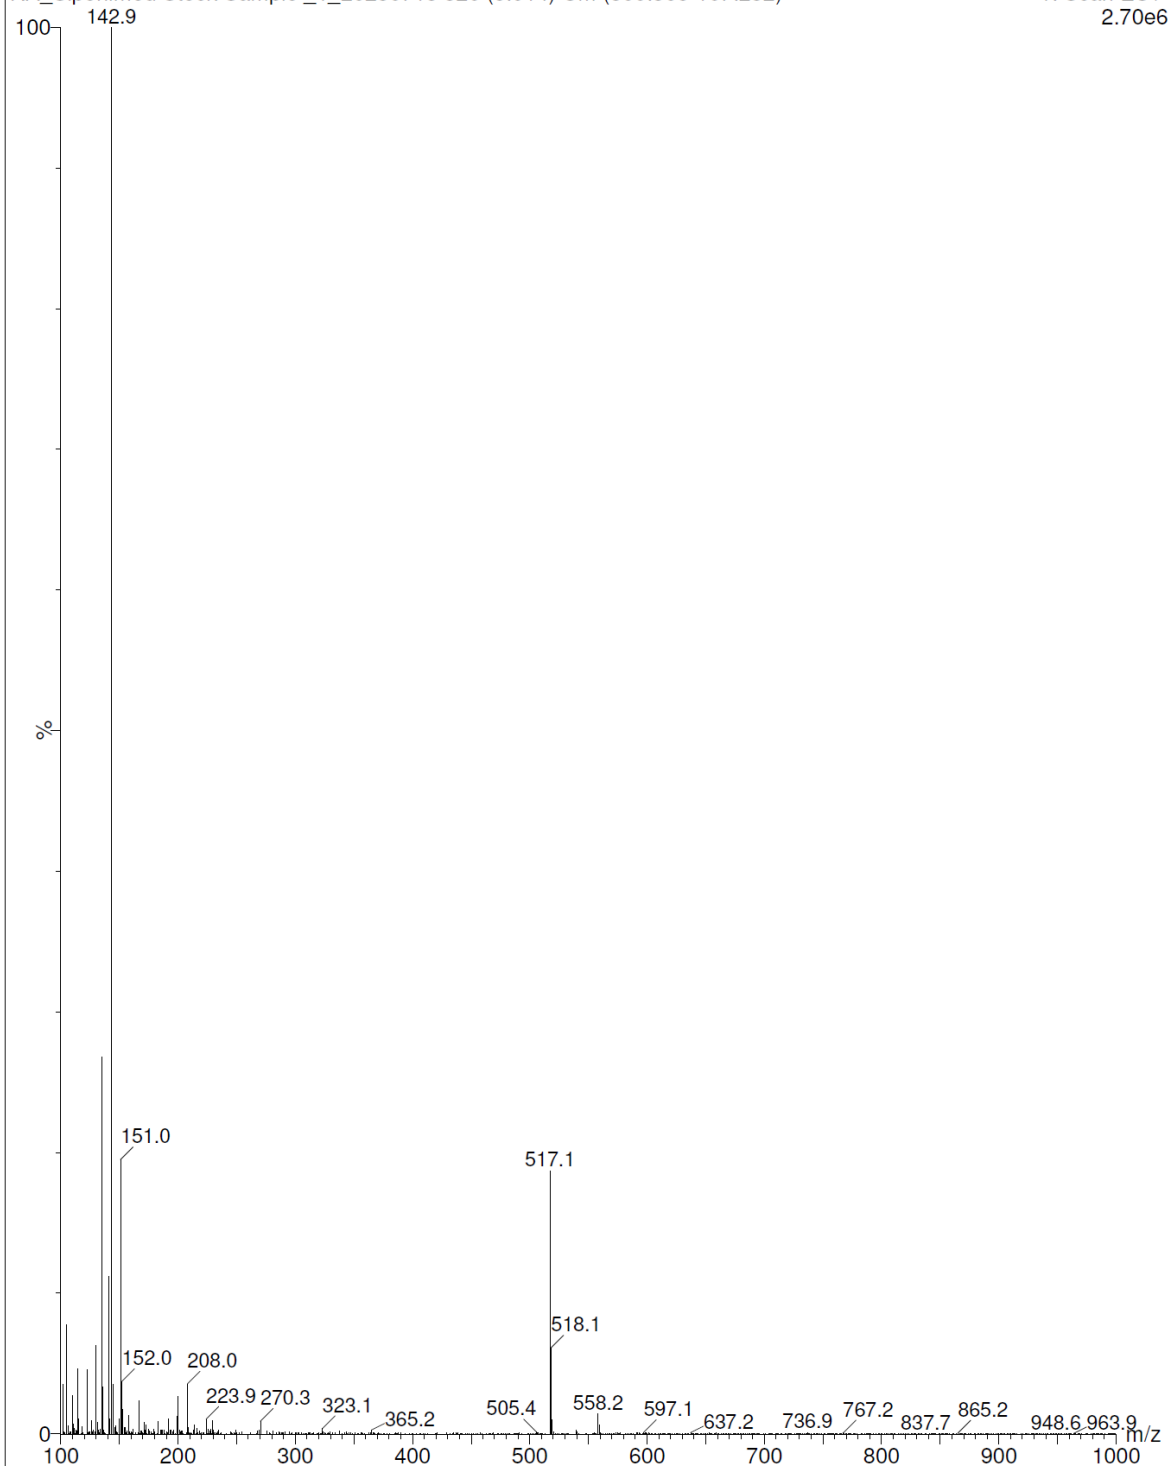

(B)

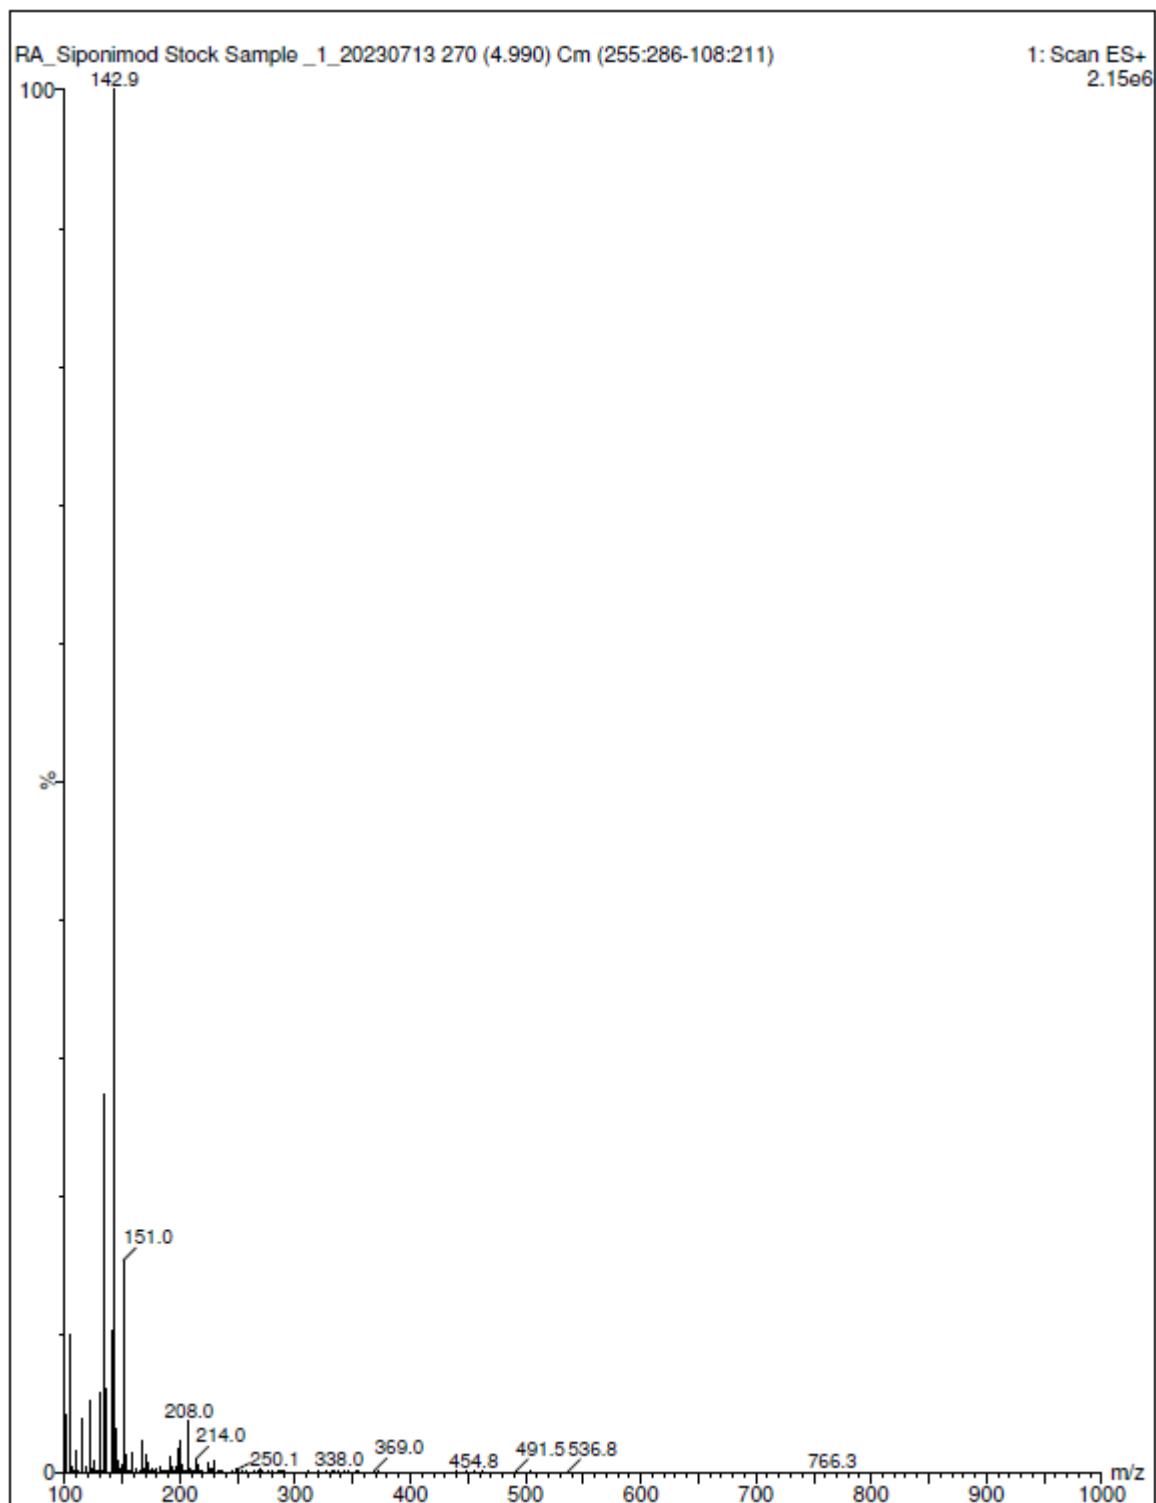

**Supplementary Figure 1.** Mass spectra of freshly prepared siponimod solution (10  $\mu\text{g/mL}$ ). (A) shows siponimod (molecular weight 516.6 g/mol) at  $m/z$  517, with a retention time of 5.79 minutes. (B) shows the mass spectrum at 4.99 minutes with no recognizable peak at  $m/z$  of 535.

(A)

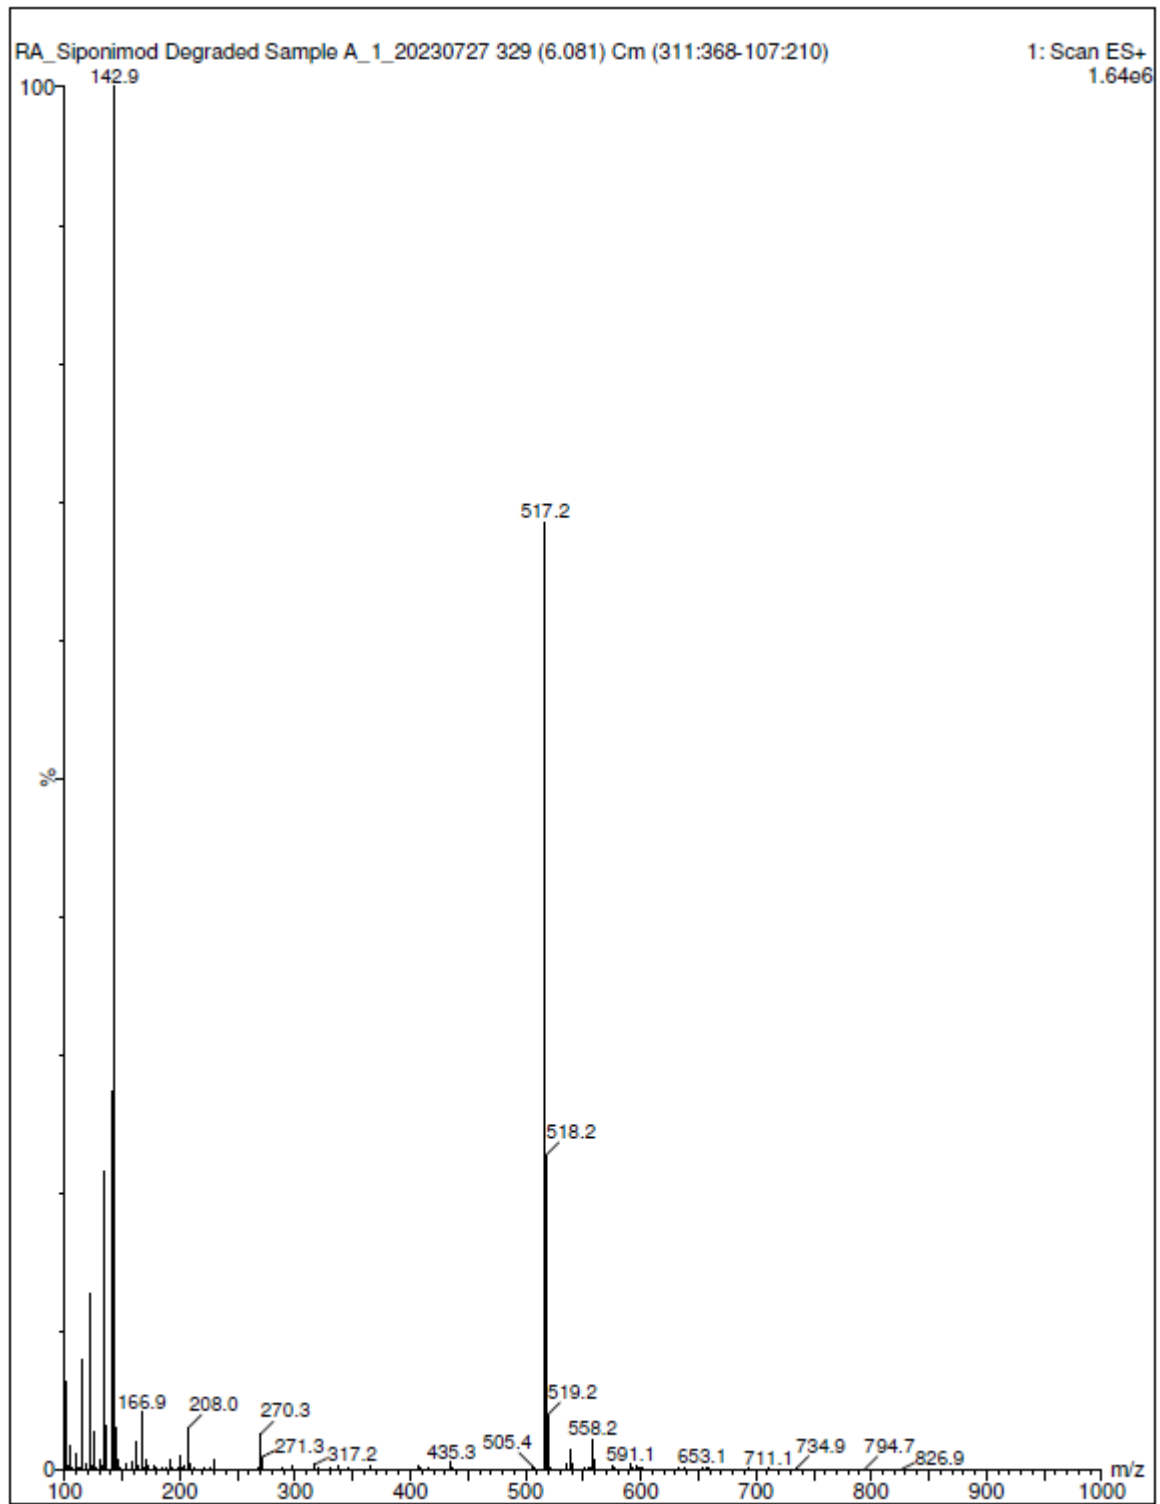

(B)

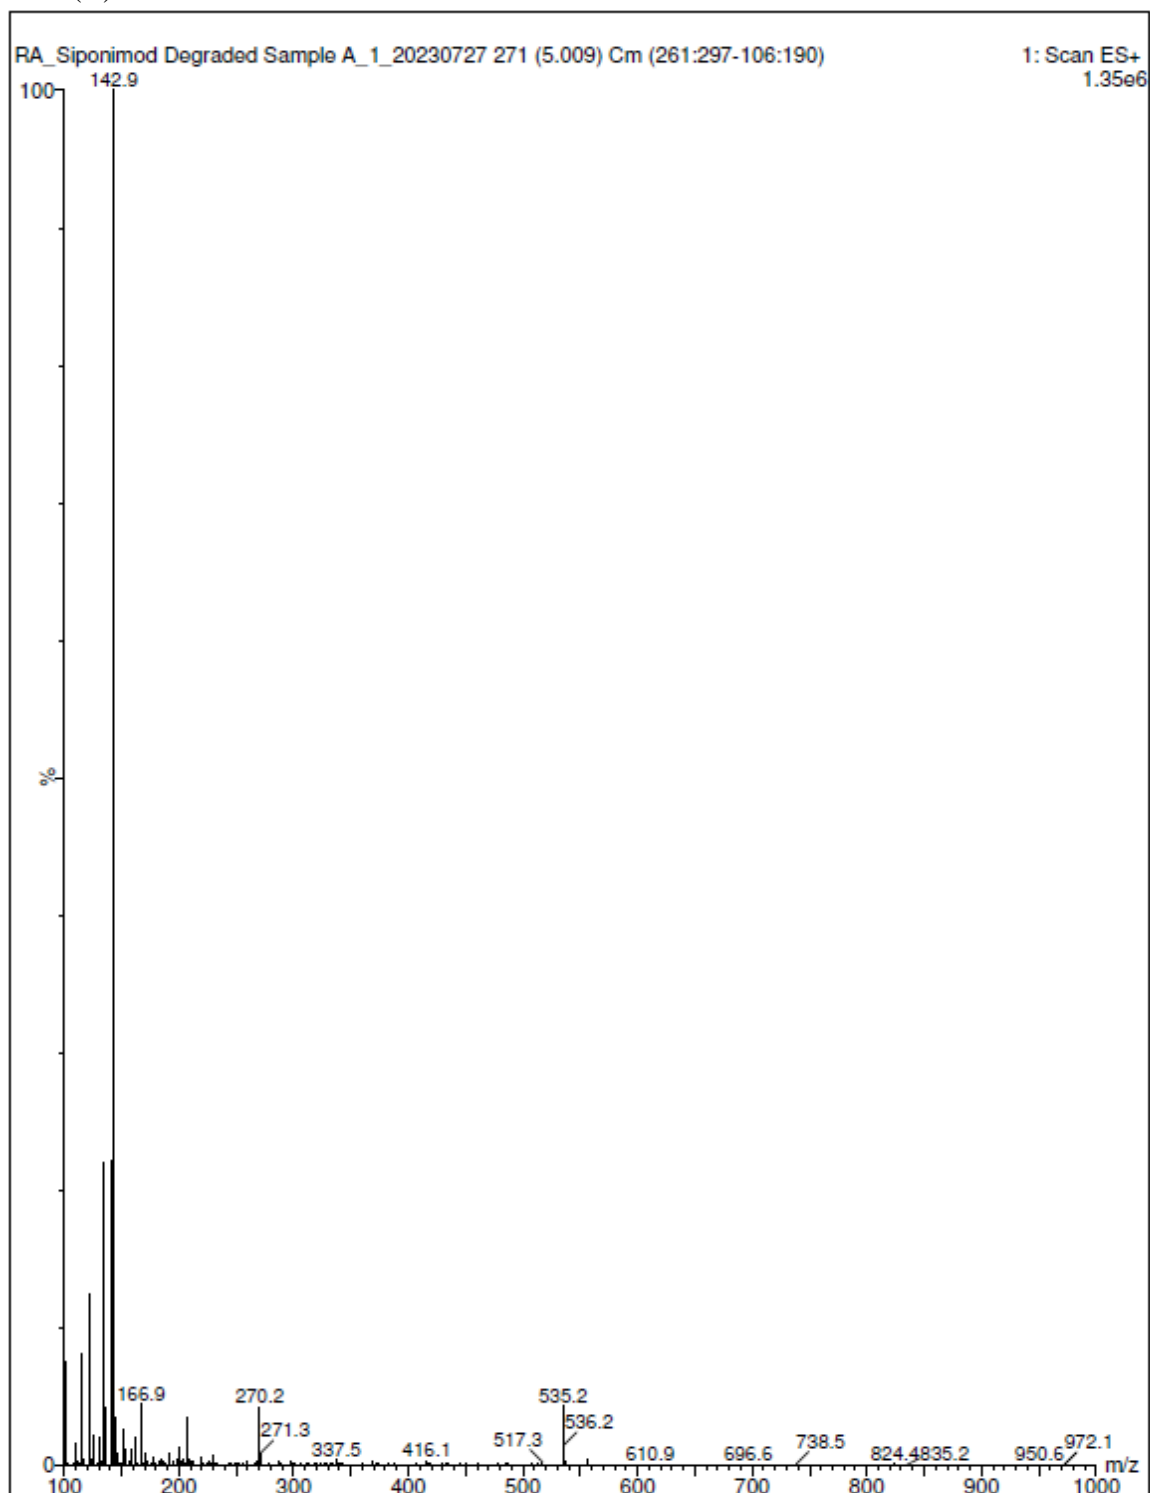

**Supplementary Figure 2.** Mass spectra of degraded sponimod solution (15 days at 40 °C). (A) mass spectrum showing sponimod at 517 m/z with a retention time of 5.98 minutes. (B) mass spectrum showing the degradation product of sponimod at m/z of 535 with a retention time of 5.00 minutes. This product uniquely appears in the degraded samples.

(A)

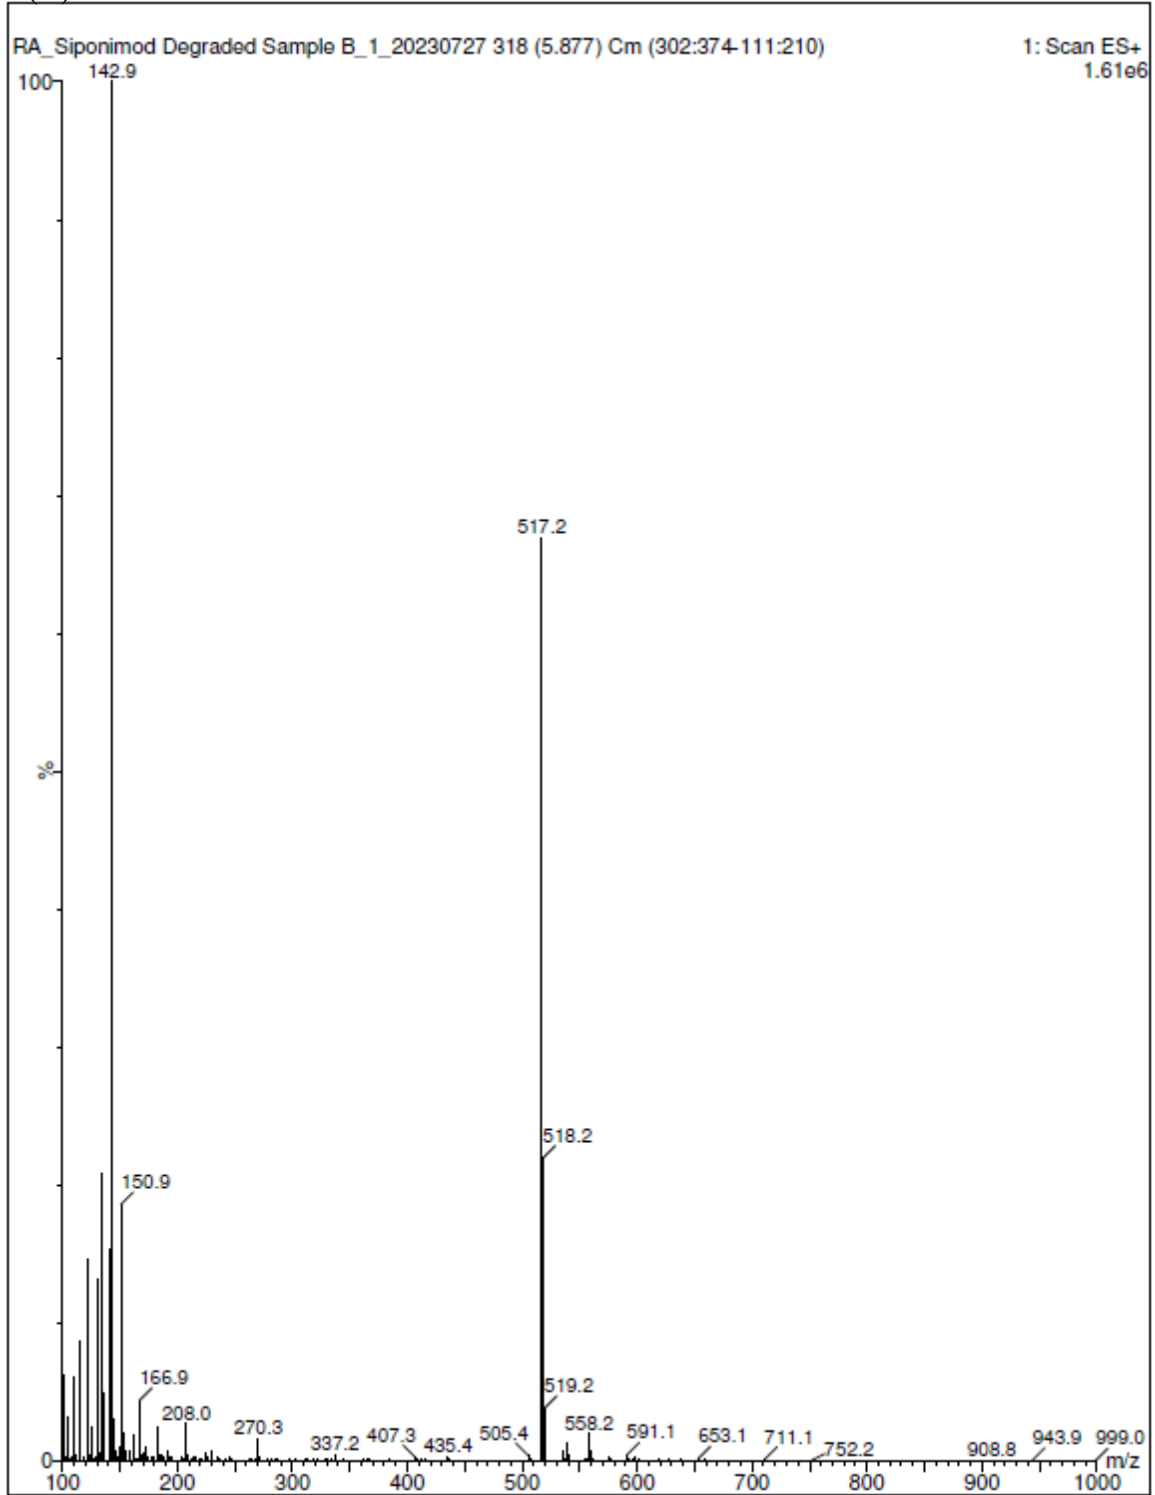

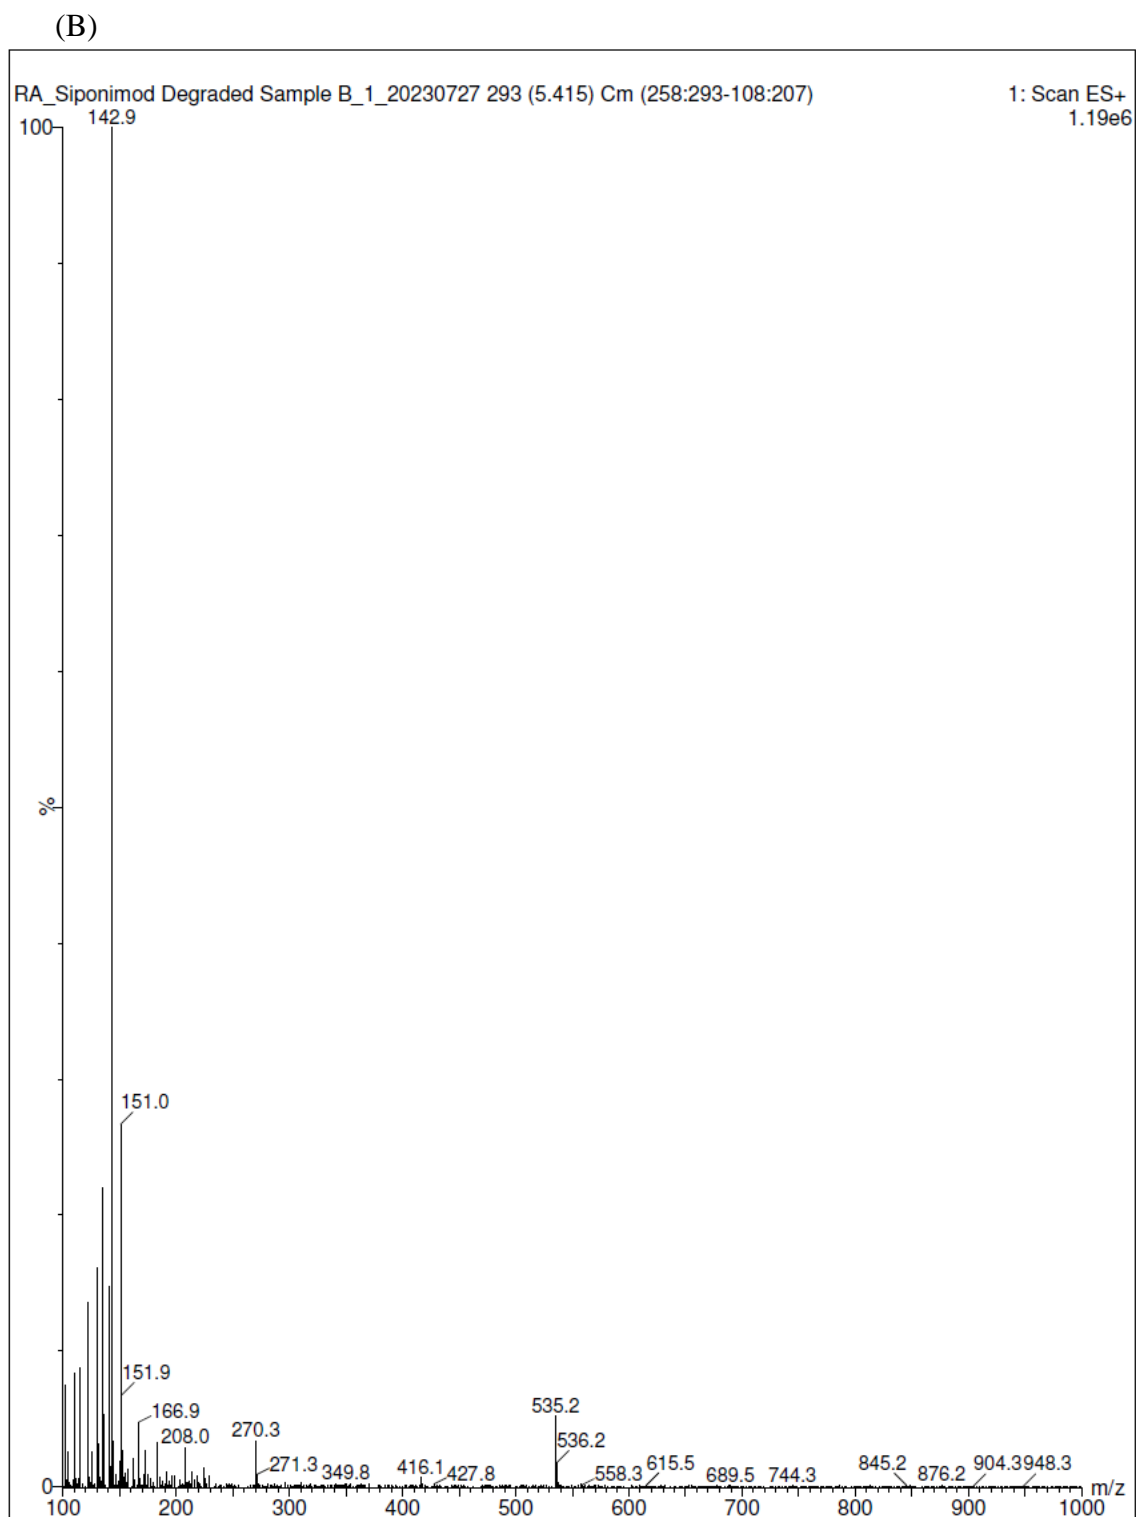

**Supplementary Figure 3.** Mass spectra of degraded siponimod solution (45 days at 40 °C). (A) mass spectrum showing siponimod at 517 m/z with a retention time of 5.97 minutes. (B) mass spectrum showing the degradation product of siponimod at m/z of 535 with a retention time of 5.00 minutes. This product uniquely appears in the degraded samples.
